# Supplementary material for: Tyrosine kinase c-Abl regulates the survival of plasma cells
Source: PubMed Central journal article supplement (PMC5216354; doi:10.1038/srep40133), 2017-01-06

## Tyrosine kinase c-Abl regulates the survival of plasma cells

Yan-Feng Li<sup>1\*</sup>, Shengli Xu<sup>1,2\*</sup>, Huang Yuhan<sup>1</sup>, Xijun Ou<sup>1</sup>, and Kong-Peng Lam<sup>1,3</sup>

<sup>1</sup>Immunology Group, Bioprocessing Technology Institute, Agency for Science, Technology and Research, Singapore 138668

<sup>2</sup>Department of Physiology and <sup>3</sup>Department of Microbiology & Immunology, Yong Loo Lin School of Medicine, National University of Singapore, Singapore 117599

Supplementary information

### Supplementary Figure 1: Deletion of c-Abl in the germinal center of c-Abl<sup>f/f</sup> Aicda<sup>cre/+</sup> mice.

(A) c-Abl<sup>+/+</sup> Aicda<sup>cre/+</sup> and c-Abl<sup>f/f</sup> Aicda<sup>cre/+</sup> mice were immunized with NP<sub>38</sub>-CGG and examined 10 days later for intracellular protein levels of c-Abl in gated GC (Fas<sup>+</sup>CD38<sup>+</sup>B220<sup>+</sup>) B cells in c-Abl<sup>+/+</sup> Aicda<sup>cre/+</sup> (red histogram) and c-Abl<sup>f/f</sup> Aicda<sup>cre/+</sup> mice (blue histogram). Negative control staining with rabbit IgG antibody (gray histogram) was included. (B) qRT-PCR analysis of gene expression of c-Abl in GC B cells sorted from immunized control and c-Abl<sup>f/f</sup> Aicda<sup>cre/+</sup> mice. Data were representative of three independent experiments.

### Supplementary Figure 2: Detection of c-Abl in c-Abl<sup>f/f</sup> Aicda<sup>cre/+</sup> IgM<sup>+</sup> plasma cells.

Naive B cells were purified from control and c-Abl<sup>f/f</sup> Aicda<sup>cre/+</sup> mice and stimulated with LPS. (A) At day 3 of culture, cells were harvested and analyzed by FACS to identify CD138<sup>+</sup>IgM<sup>+</sup> plasma cells at day 6 of culture. (B) qRT-PCR analyses of c-Abl in c-Abl<sup>f/f</sup> Aicda<sup>cre/+</sup> IgM<sup>+</sup> PCs. Untreated naïve B cells purified from c-Abl<sup>f/f</sup> Aicda<sup>cre/+</sup> mice were used as control. The expression level of c-Abl was normalized to that of  $\beta$ -actin. Data were representative of three independent experiments.

### Supplementary Figure 3: Expression levels of anti-apoptotic Bcl-2, Bcl-XL and Mcl-1 mRNAs remained unchanged in plasma cells from control and c-Abl<sup>f/f</sup> Aicda<sup>cre/+</sup> mice.

qRT-PCR analyses of Bcl-2, Bcl-xL, and Mcl-1 mRNA in sorted PCs from control (red columns) and c-Abl<sup>f/f</sup> Aicda<sup>cre/+</sup> (blue columns) mice. Data were representative of at least three independent experiments.

**A**

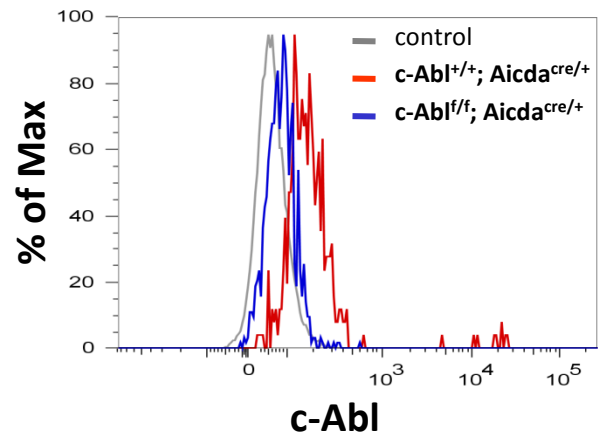

**B**

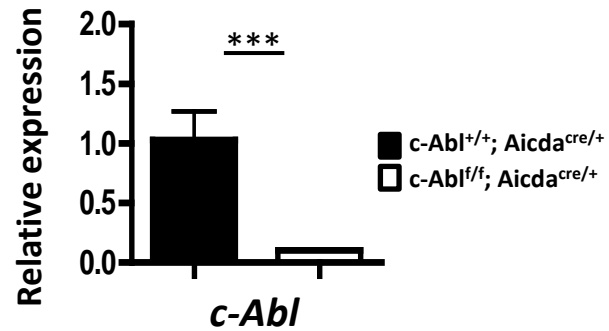

**A**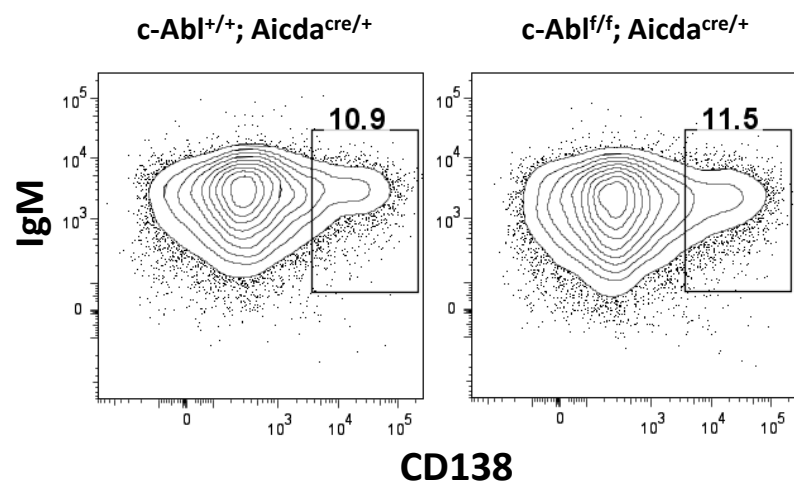**B**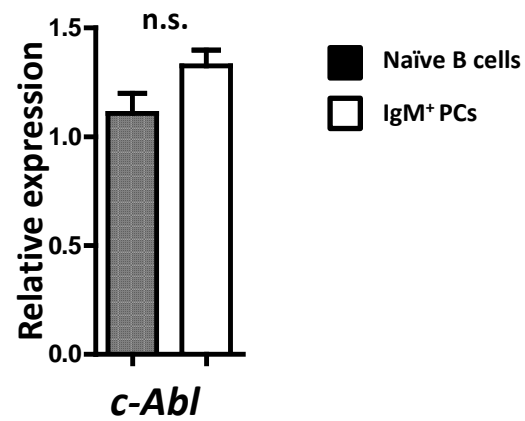

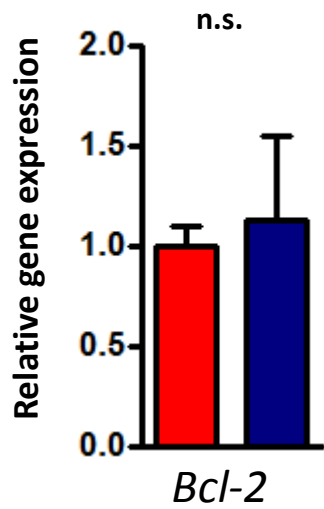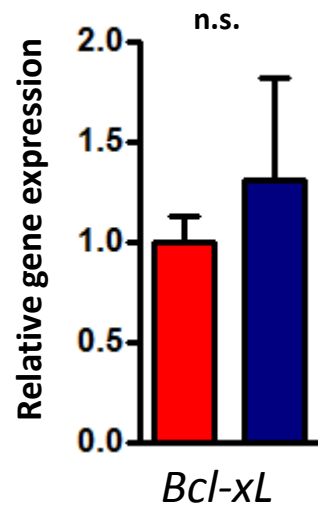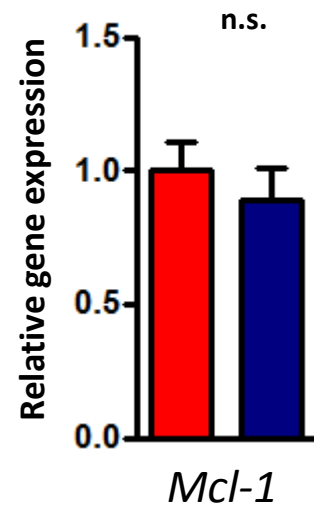

Supplement: srep40133-s1.pdf [file srep40133-s1.pdf]
